# Supplementary material for: Effective Treatment of Patients Experiencing Primary, Acute HIV Infection Decreases Exhausted/Activated CD4+ T Cells and CD8+ T Memory Stem Cells
Source: Cells. 2022 Jul 27;11(15):2307. doi: 10.3390/cells11152307 (PMC9367582; doi:10.3390/cells11152307)
Supplement: Supplementary file 1 [file cells-11-02307-s001.zip › Figures S1-S7.pdf]

**A**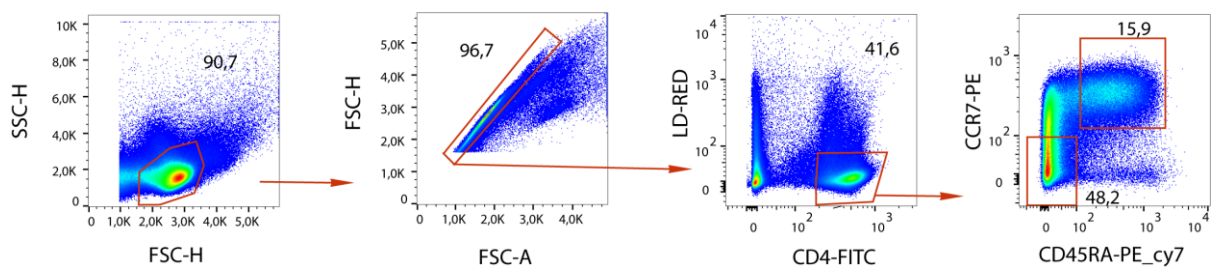**B**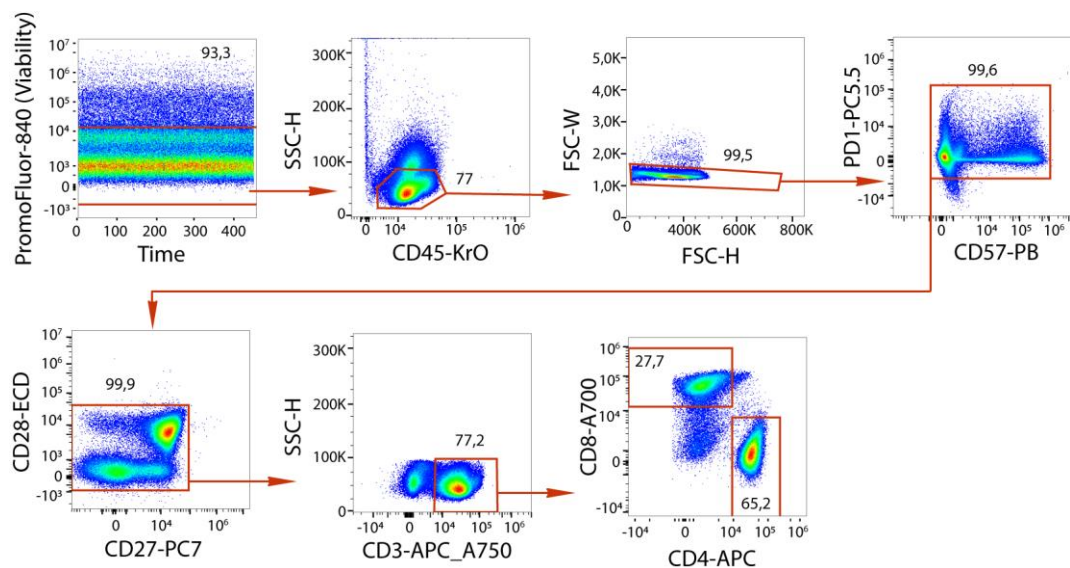**C**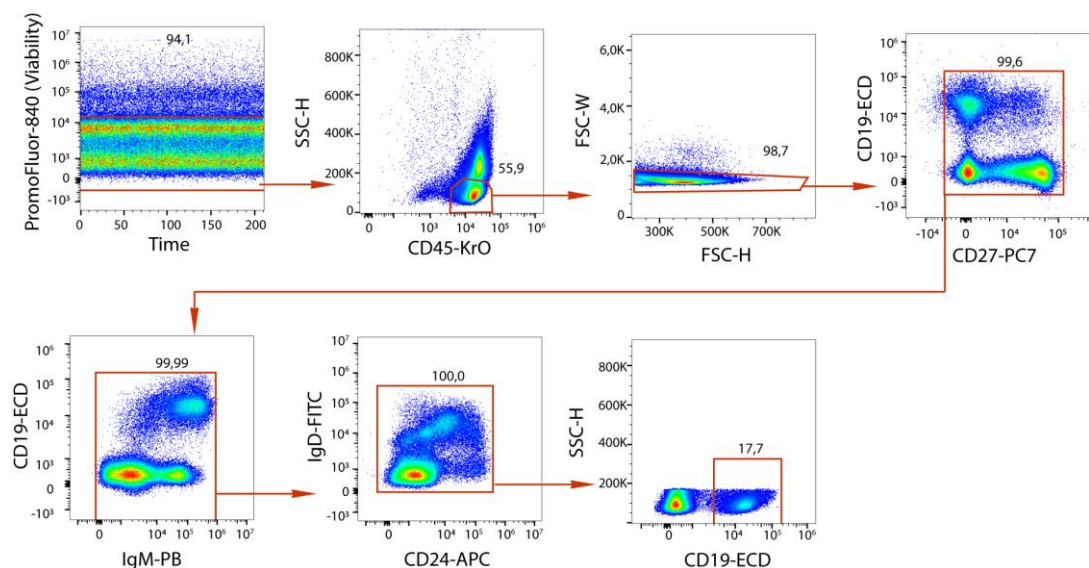

**Figure S1. Representative gating strategies**

(A) Gating strategy used to identify and isolate viable naïve (CD45RA+CCR7+) and effector memory (CD45RA-CCR7-) within CD4+ T cells. (B) Representative gating strategy used to identify CD4+ and CD8+ T cell among PBMC. (C) Representative gating strategy used to identify B cells among PBMC. Selected CD4+, CD8+, CD19+ main populations were analyzed by unsupervised clustering analyses.

**A**

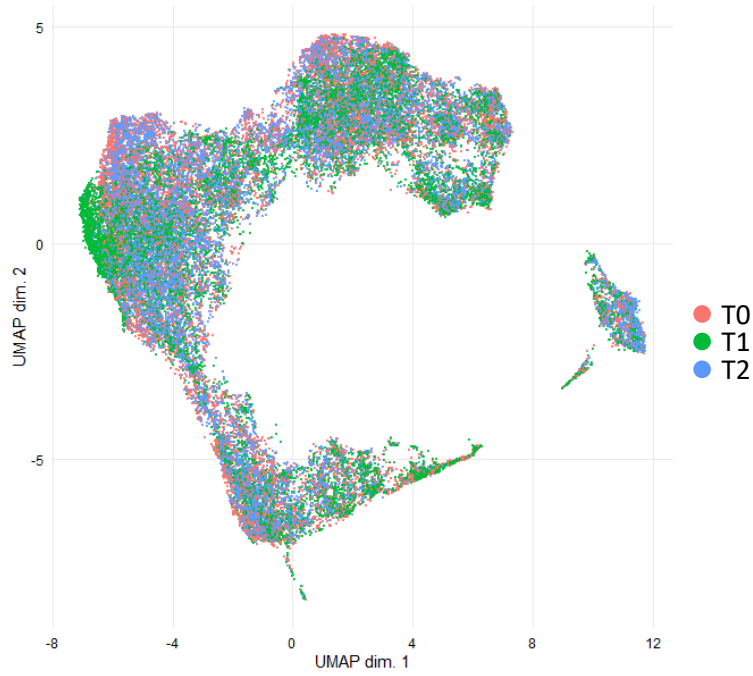

**B**

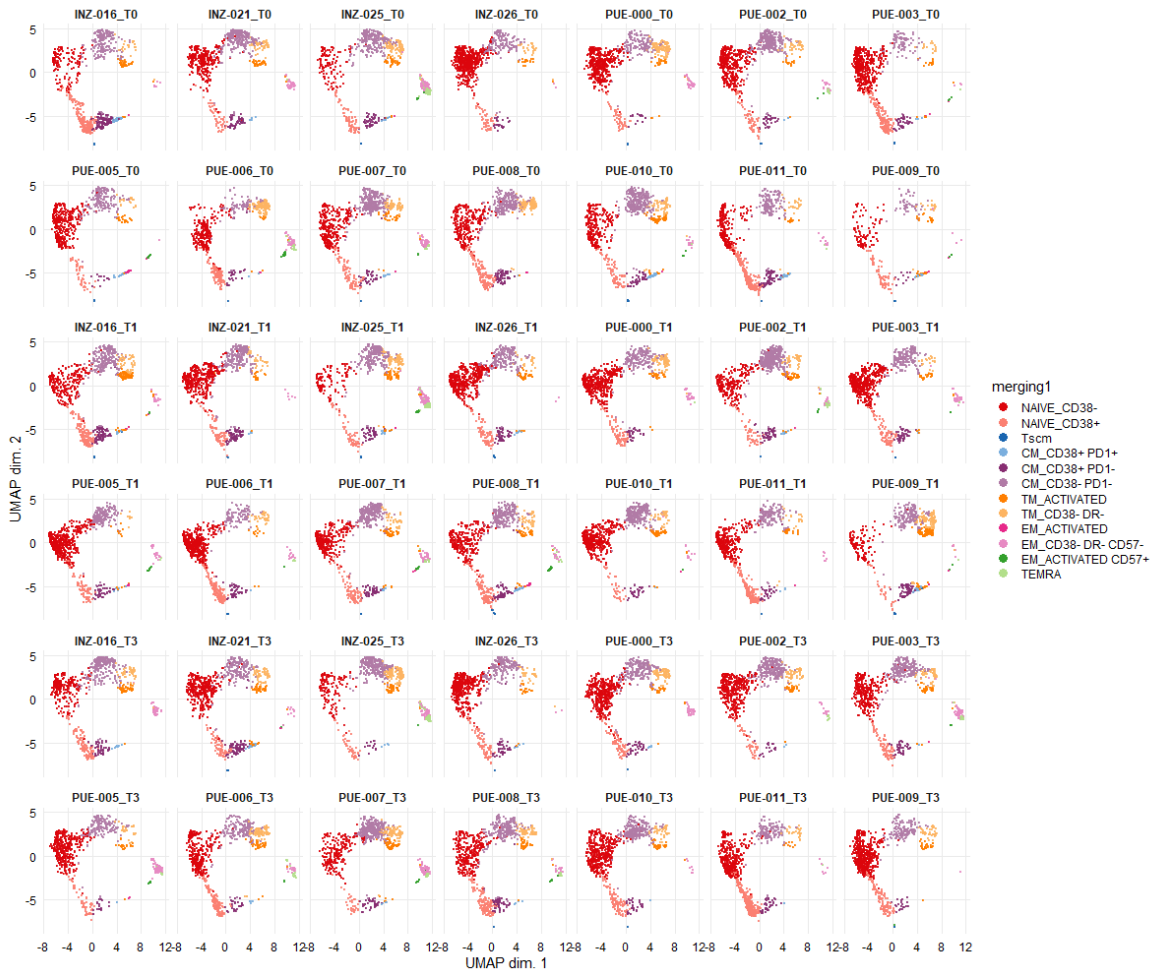

**Figure S2. Quality control CD4+ T cells**

(A) UMAP graphs of CD4+ T cells overlaid for multiple condition; (B) Projection of UMAP graph stratified by sample.

A

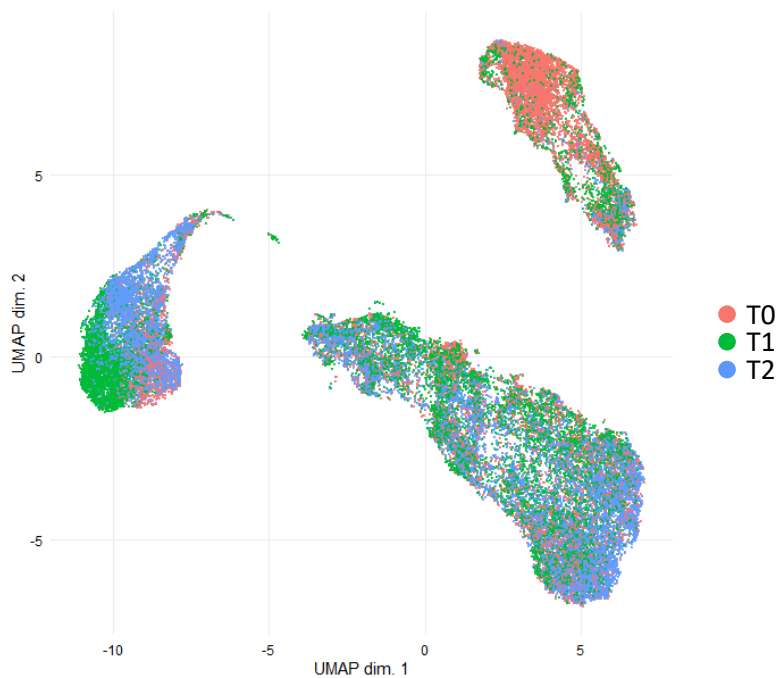

B

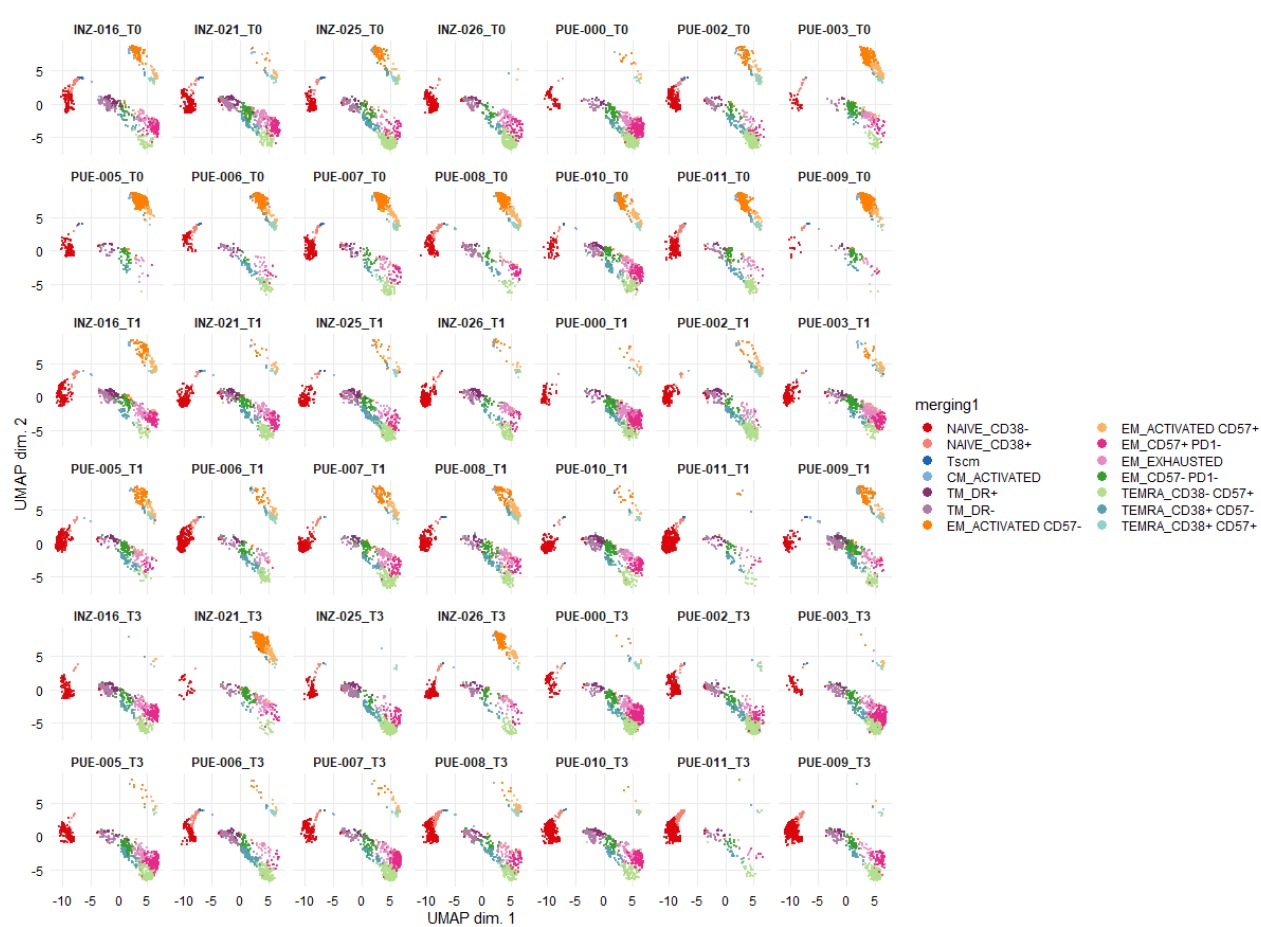

**Figure S3. Quality control CD8+ T cells**  
(A) UMAP graphs of CD8+ T cells overlaid for multiple condition; (B) Projection of UMAP graph stratified by sample.

**A**

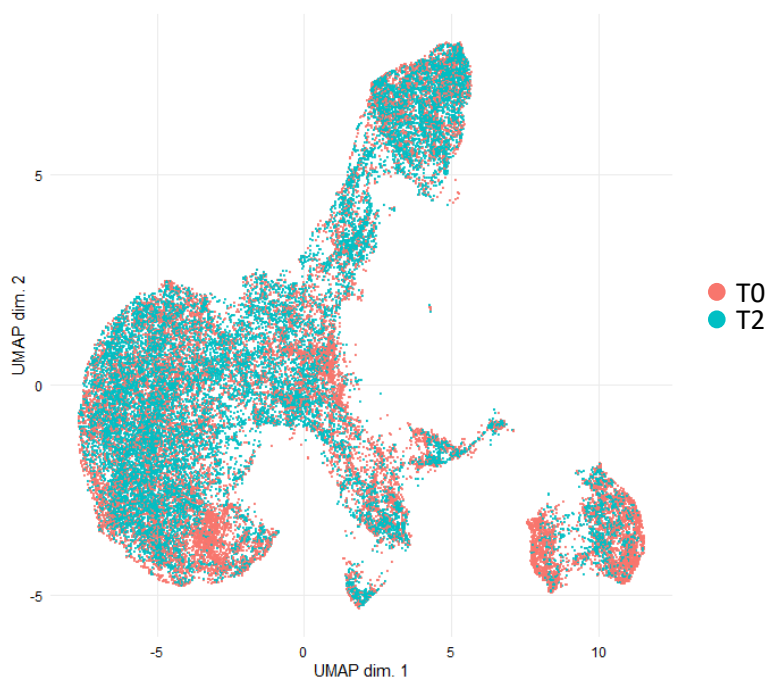

**B**

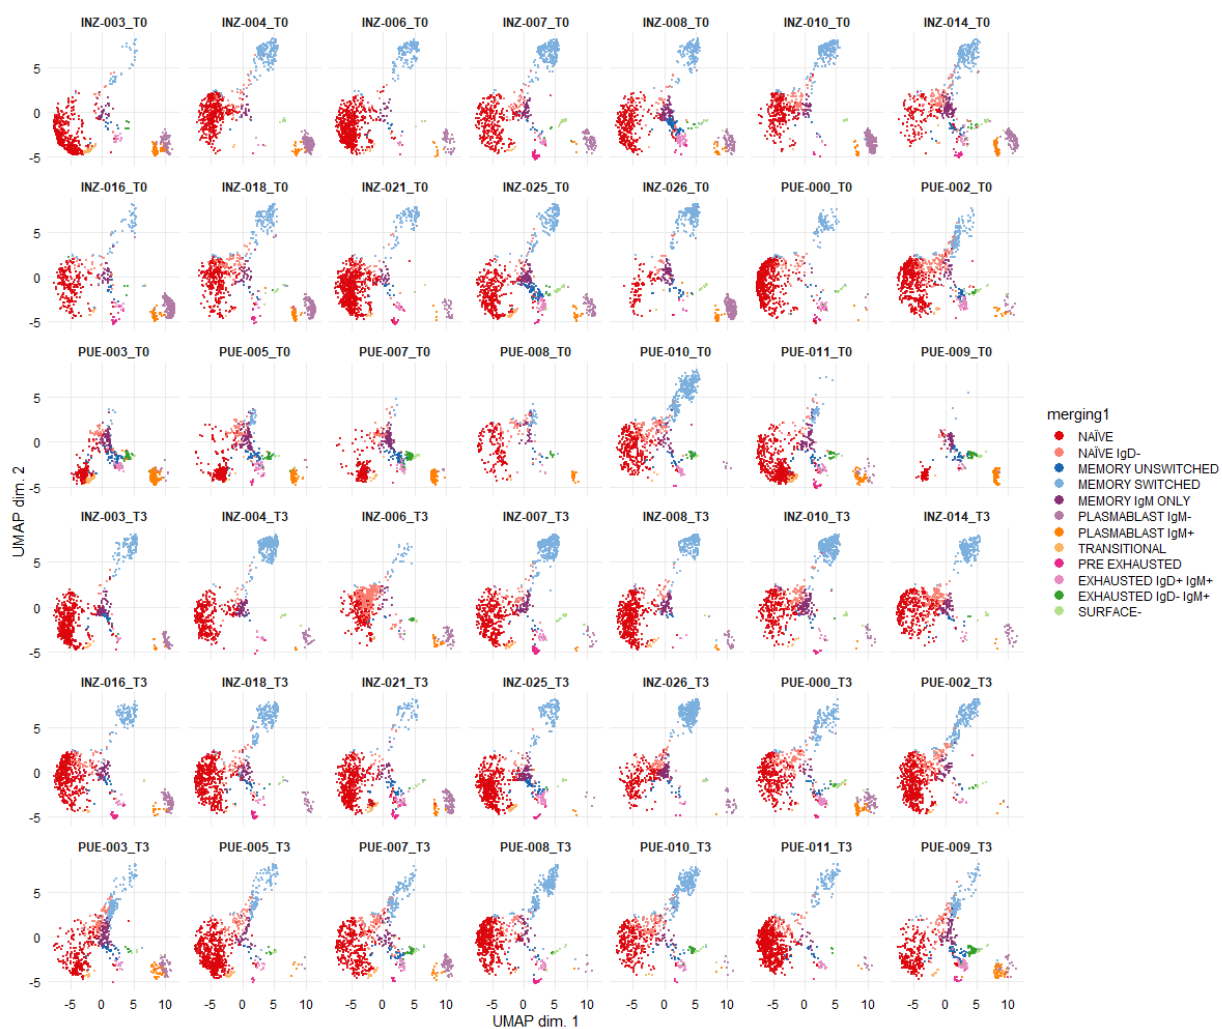

**Figure S4. Quality control CD19+ B cells**

(A) UMAP graphs of CD19+ B cells overlaid for multiple condition; (B) Projection of UMAP graph stratified by sample.

**A**

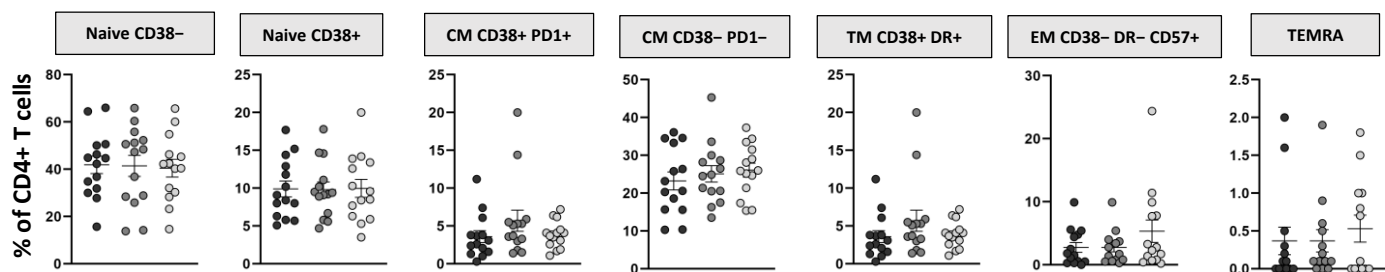

**B**

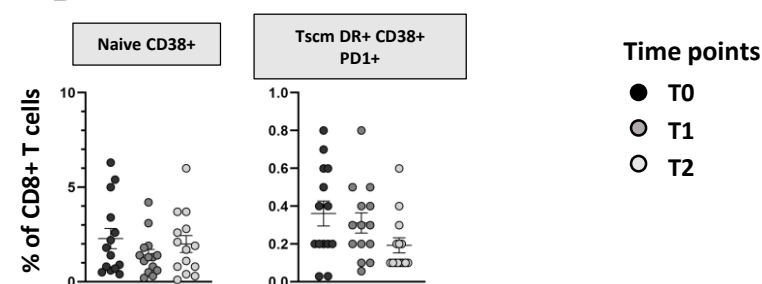

**C**

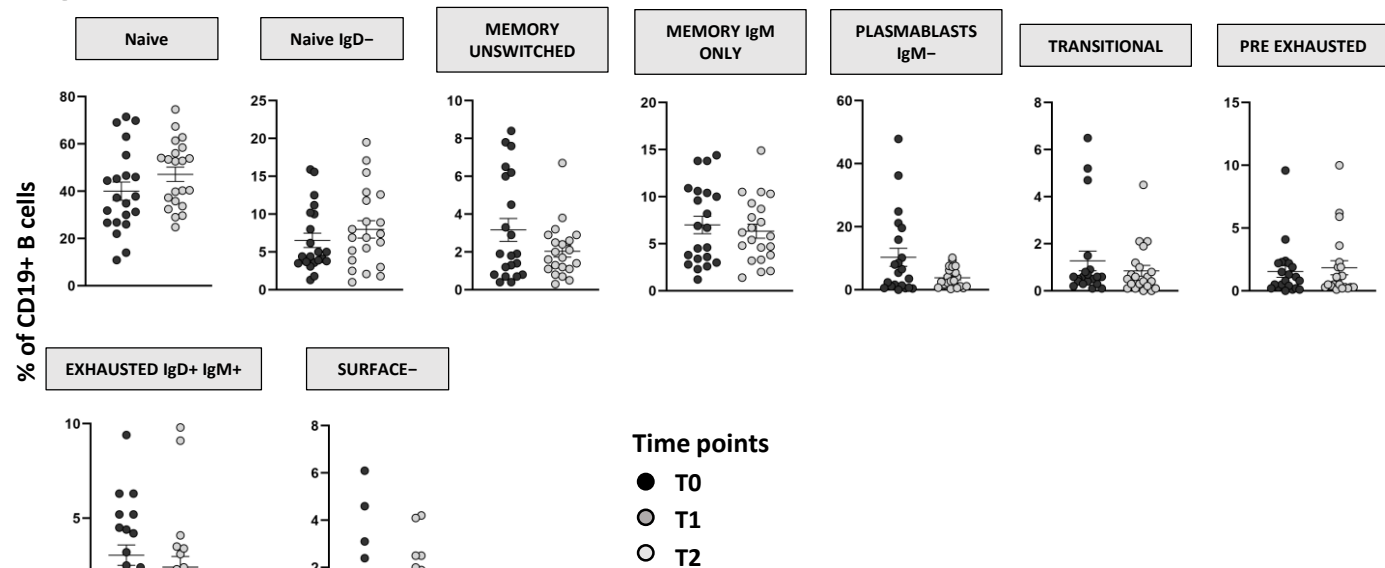

**Figure S5.** Dotplots showing the percentage of cells whose percentage remains unchanged after therapy initiation. (A) CD4+ T cells; (B) CD8+ T cells and (C) CD19+ B cells. T0 (black circles; n=14), T1 (grey circles; n=14) and T2 (lightgrey circles; n=14) timepoints. The central bar represents the mean  $\pm$  SEM. The adjusted p-values were obtained by patient pairing generalized linear mixed model (GLMM) that compares cluster percentages at T0, T1 and T2 (threshold: FDR $\leq$ 0.05).

**A**

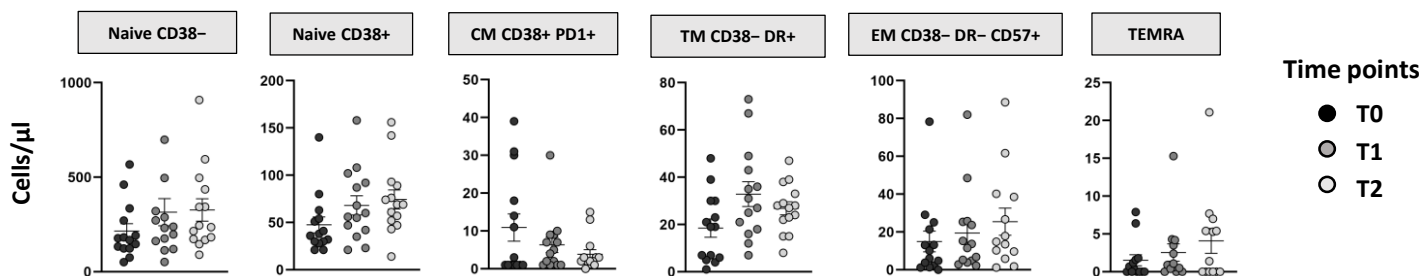

**B**

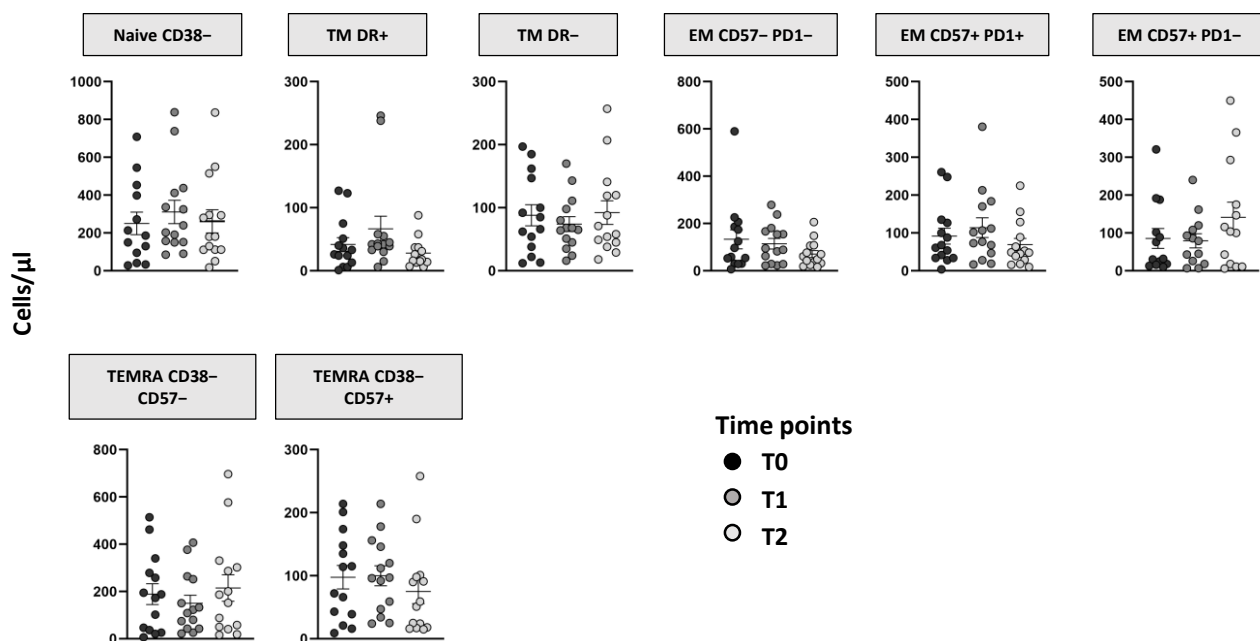

**Figure S6.** Dotplots showing the absolute number of cells whose remains unchanged after therapy initiation. (A) CD4<sup>+</sup> T cells; (B) CD8<sup>+</sup> T cells. T0 (black circles; n=14), T1 (grey circles; n=14) and T2 (lightgrey circles; n=14) timepoints. The central bar represents the mean  $\pm$  SEM. The adjusted p-values were obtained by patient pairing generalized linear mixed model (GLMM) that compares cluster percentages or absolute count at T0, T1 and T2 (threshold: FDR $\leq$ 0.05).

# A

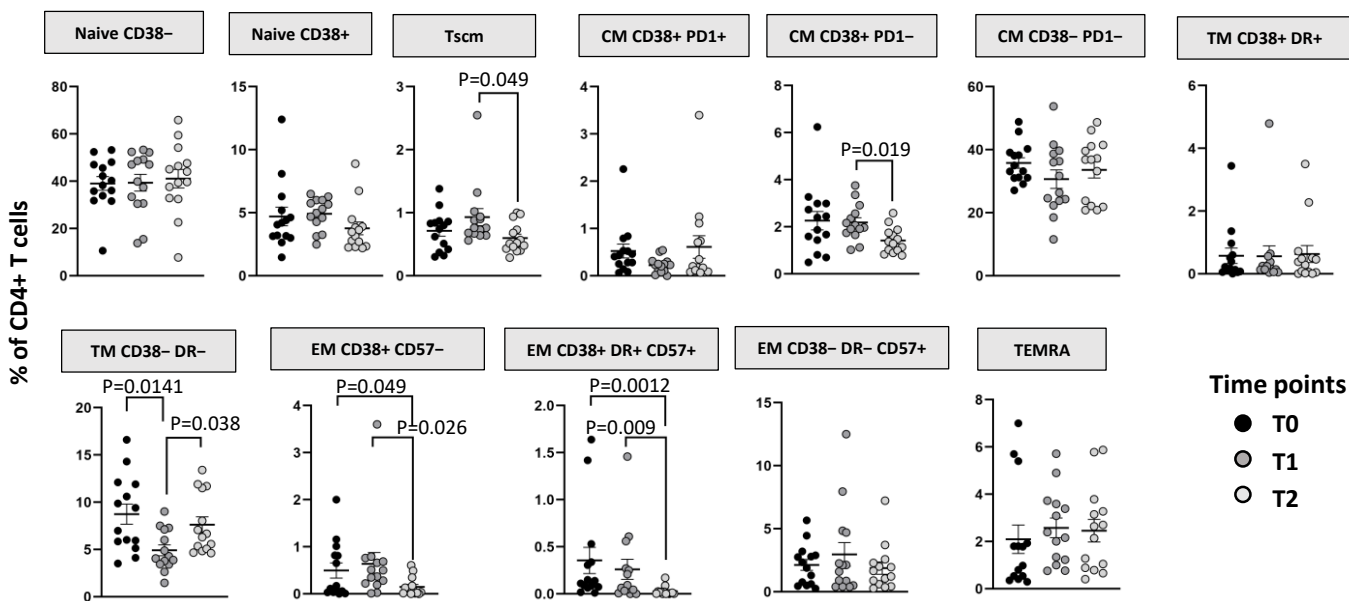

# B

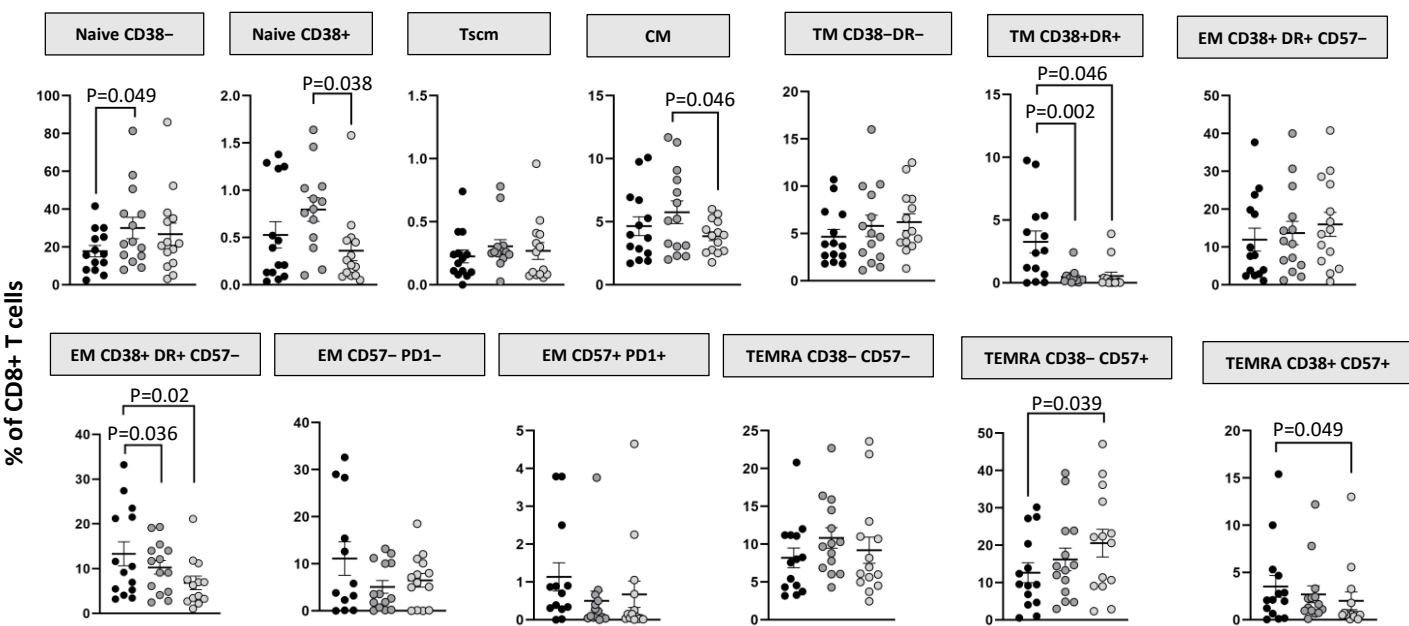

# C

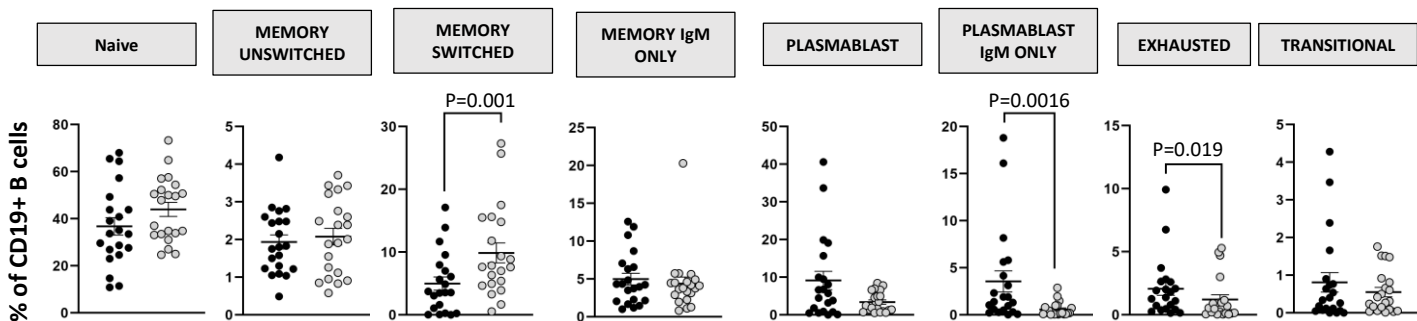

**Figure S7.**

Dotplots showing the relative cells percentage obtained by regular manual-gating analysis from T0 (black circles; n=14), T1 (grey circles; n=14) and T2 (lightgrey circles; n=14) conditions in (A) CD4+ T cells, (B) CD8+ T cells and (C) CD19+ B cells. The central bar represents the mean  $\pm$  SEM. One-way Kruskal-Wallis test with Benjamini-Hochberg correction for multiple comparisons was used to test the differences (for CD4+ and CD8+ T cells) among the three groups; q-values are indicated in the figure. For CD19+ B cells was used Mann-Whitney nonparametric test to test the differences among the two groups. Exact p-values are indicated in the figure.
