# Supplementary material for: Effective Treatment of Patients Experiencing Primary, Acute HIV Infection Decreases Exhausted/Activated CD4+ T Cells and CD8+ T Memory Stem Cells
Source: Cells. 2022 Jul 27;11(15):2307. doi: 10.3390/cells11152307 (PMC9367582; doi:10.3390/cells11152307)
Supplement: Supplementary file 1 [file cells-11-02307-s001.zip › Table S4. .xlsx]

## Sheet: sheet1
Table of data used to perform principal component analysis (PCA) and sperman correlation matrix (Figure 5).
NA: not available
													CD19															CD4									CD8
SAMPLE ID	group_id	Age	Fiebig	bmi	CD4_count	CD8_count	HIV_viral_load	CD4:CD8_ratio	NAIVE	NAIVE IgD-	MEMORY UNSWITCHED	MEMORY SWITCHED	MEMORY IgM ONLY	PLASMABLAST IgM-	PLASMABLAST IgM+	TRANSITIONAL	PRE EXHAUSTED	EXHAUSTED IgD+ IgM+	EXHAUSTED IgD- IgM+	SURFACE-	NAIVE_CD38-	NAIVE_CD38+	Tscm DR+ CD38+ PD1+	CM_CD38- PD1-	CM_CD38+ PD1+	CM_CD38+ PD1-	TM_CD38- DR+	TM_CD38- DR-	EM_CD38+ DR+	EM_CD38+ DR+ CD57+	EM_CD38- DR- CD57+	TEMRA	NAIVE_CD38-	NAIVE_CD38+	Tscm CD38+ DR+ PD1+	CM_CD38+ DR+	TM_DR-	TM_DR+	EM_CD38+ DR+ CD57-	EM_CD38+ DR+ CD57+	EM_CD57+ PD1+	EM_CD57+ PD1-	EM_CD57- PD1-	TEMRA_CD38- CD57+	TEMRA_CD38- CD57-	TEMRA_CD38+ CD57+	Hiv DNA_TN	Hiv DNA_TEM
INZ-016_T0	T0	49	5	23.7	385	875	1279852	0.44	26	3.1	1.2	7.3	3.4	47.9	6.7	0.4	2.2	0.9	0.3	0.5	34.8	8.4	0.4	23.2	7.9	15.2	6.1	3.3	0.1	0.0089	0.6	0	14.9	2.6	0.6	2.6	10.5	4.1	15.6	5.5	4.8	21.5	3.4	5.4	2.4	4.8	1.6	32.4
INZ-021_T0	T0	30	4	20.7	522	1394	2269109	0.374462	69.9	4.1	0.8	11.1	3.6	3.5	0.5	0.7	4.1	1.6	0	0.2	36.8	5.7	0.1	36.1	0.5	5.8	3.7	6.2	0	0.2	4.8	0	28.6	1.4	0.4	0.4	11.6	5.4	1	2	9.1	13.8	9	7.3	8.2	1.7	0.18	1.48
INZ-025_T0	T0	44	5	24	792	1171	66000	0.676345	34.9	3.9	7.8	16	9.6	8	2	4.7	1.9	6.3	0.3	4.6	15.7	8	0.5	26.4	1.4	3.9	3.8	14.7	0.1	1.6	9.9	14	12.8	1.8	0.4	0.7	7.3	2.2	9.9	1.9	2.9	6.5	5	29	14.9	4.8	8	8
INZ-026_T0	T0	39	4	26.8	411	1763	369000	0.233125	10.9	3.5	1.9	29.1	10.6	36.3	4.8	0.4	0.5	0.6	0.1	1.3	66	5.1	0.034	20.6	0.2	2.6	1.6	3.5	0	0.015	0.3	0	40.2	0.6	0.2	0.1	10.5	2.9	0.1	0.1	5.7	5.8	3	26.2	4.1	0.4	1.2	34
PUE-000_T0	T0	27	4	20.3	662	2215	3578	0.298871	71.5	4.4	0.7	14.2	1.2	0.5	0.2	0.3	1.5	4.2	0.2	1.2	50.6	5.8	0.022	18.6	0.2	2	3.1	15.1	0	0	4.4	0.1	8.4	0.4	0	0.1	3	1.8	0.8	0.7	11.8	34.6	8.4	23.2	6.1	0.6	2.2	1.4
PUE-002_T0	T0	35	3	25.7	397	828	500000	0.479469	46	15.9	4.5	17.5	2.8	1.6	1.8	0.6	0.5	5.2	2.4	1.2	44.9	9.1	0.1	33.3	0.3	3.1	1.3	4.5	0	0.3	1.5	1.6	27.3	2.2	0.5	0.8	6.9	0.8	6.7	3.2	3.6	2.3	3.8	24.8	8.4	8.7	4	38
PUE-003_T0	T0	23	4	20.8	282	785	742000	0.359236	26.8	5	6	0.8	10.9	1.4	21.7	15.3	0.1	6.3	5.4	0.3	64.5	14.4	0.1	10.4	0.3	4.1	2.6	2.3	0.4	0.3	0.5	0.1	4.9	0.8	0	0.3	1.5	0.7	29.3	29.1	10.6	3.6	11.7	3.2	1.9	2.2	NA	NA
PUE-005_T0	T0	39	4	24.6	1270	12294	1414832	0.103302	45.3	8	6.2	4	13.8	1.1	9.7	0.6	0.8	5.2	4.7	0.6	44.7	6.3	0.2	20.3	3.1	1.7	3.8	14	2.6	1	0.3	0	13.4	0.5	0.2	0.4	1.6	1	71.7	3.4	1.1	0.2	4.8	0.3	1.2	0.1	NA	NA
PUE-007_T0	T0	28	4	20.7	234	2062	182536	0.113482	30	6.2	6.5	0.9	14.4	0.4	23.8	1.5	0.2	4.5	9.9	1.6	31.9	11.8	0.053	34.5	0.6	4.1	2.4	7.9	0.1	0.5	5.6	0.5	22	3.4	0.6	0.6	3	1.6	32.8	12.7	2.6	4.3	2.6	8.4	2.1	3.3	NA	NA
PUE-008_T0	T0	32	2	23.5	169	235	10000000	0.719149	46.6	15.6	1.9	15.6	10.4	0	5.2	0.8	0.8	1.4	1.6	0	30	17.7	0	25.8	0.3	7.1	0.3	18.6	0.3	0.0049	0	0	12.5	6.3	0.2	1.3	9.3	0.6	36.1	13.2	1.9	4.3	2.8	2.7	3.9	4.9	NA	NA
PUE-009_T0	T0	34	4	28.1	268	2593	117506	0.103355	22	3.8	7.6	0.6	13.8	0.6	25.1	0.6	0	2.4	21	2.4	46.3	8	0.6	15.6	5.3	3.5	11.2	5.6	1.2	0.9	1.8	0	1.3	0.7	0.2	1.9	0.5	0.5	75.2	6.5	1.3	0.5	8	0.8	1.5	1.1	NA	NA
PUE-010_T0	T0	32	4	24	527	2259	77327	0.233289	31.8	11.2	1.8	38.9	4.5	0.7	0.1	0.2	0.4	3.2	6.4	1	27.8	10.2	1	34.6	3.5	5.5	7.4	6.8	0.1	0.2	2.5	0.3	4.2	0.9	0.2	3.6	6.5	5.6	16.1	7.6	11	14.2	10	11.4	5.1	3.5	NA	NA
PUE-011_T0	T0	23	4	26.6	921	2711	442843	0.339727	55.3	3.7	2.9	5.6	6.9	2.4	6.8	6.5	2.2	4.4	2.9	0.5	50.1	15.2	0.5	15.7	3.4	9.1	2.1	2.3	0.1	0	1.1	0.2	20.1	5.4	0.7	1.4	1.4	0.9	32.7	4.6	2.5	0.6	6.4	10.3	7.9	5.1	NA	NA
INZ-016_T2	T2	49	5	23.7	515	611	40	0.842881	52.9	5.5	2	14.7	5.4	6.2	1.8	0.3	10	1.1	0	0.3	28.3	13.4	0.1	31.5	0.5	6.1	6.4	5.9	0	0.023	7.8	0	18.4	0.8	0.1	0.1	19.6	6	0.1	0.4	8.1	28.6	5.2	8.2	4	0.3	0.18	0.46
INZ-021_T2	T2	30	4	20.7	608	701	40	0.867332	58.5	3	2.6	7.2	3.2	10.2	2.6	4.5	3.6	3.1	0.3	1.1	40.3	7.7	0.2	26	2.5	8.9	6.2	6	0.3	0.2	1.7	0	2.5	0.4	0.2	0.6	2.5	0.9	41.7	20.2	7.6	2.6	15.1	2.3	2.5	0.9	0.44	10.6
INZ-025_T2	T2	44	5	24	1151	1699	40	0.677457	53.5	2.1	6.7	15.5	10.5	0.7	0.3	2.1	1.9	4.1	0.1	2.5	14.7	5.3	0	34.4	0.3	2.3	4.1	19	0	0.2	7.7	12	10.6	1.1	0.1	0.2	15.1	3.4	0	0.2	1.7	6.8	3.6	41	15.2	0.8	3.2	0.36
INZ-026_T2	T2	39	4	26.8	907	597	40	1.51926	24.8	6.9	2.9	49.6	10.3	2.7	0.2	0	0.4	1	0	1.2	54.8	8.4	0.1	24.7	1.4	5.2	1.7	3.6	0	0	0.2	0	18.6	1.9	0.6	0.9	9.7	2.3	26	13.4	8.1	1.9	6.1	6.9	2.8	0.7	0.44	2.2
PUE-000_T2	T2	27	4	20.3	809	1830	40	0.442077	37.3	8.9	2.5	18.4	2.1	7.6	5.7	0.4	1.2	9.8	1.9	4.1	42.5	8.5	0.2	25.2	0.7	4.6	3.5	11.5	0	0	3.3	0	9.9	0.8	0.1	0.2	2.7	2	0.8	1.2	12.3	37.5	8.1	18.1	4.9	1.5	0.64	2.8
PUE-002_T2	T2	35	3	25.7	962	1035	292	0.929469	54.1	12.6	0.8	24.2	4.6	0.6	0.3	1	0.1	1	0.5	0.4	45.3	5.9	0.049	33.5	0.1	1.8	4.1	7	0	0.1	1.4	0.8	21.9	2.1	0.1	0.2	8.8	1	0	0.3	3.3	7.4	3.6	42.8	7.5	1	5.8	8
PUE-003_T2	T2	23	4	20.8	541	1349	40	0.401038	29.7	15.5	2.9	21.6	14.9	7.3	4.7	0.5	0.2	1.5	0.6	0.4	32.1	9.6	0.1	28.1	0.3	5.3	4.5	7.3	0.1	0.3	11.4	1	4.9	0.1	0.1	0	6.9	2.5	0.3	0.8	8.6	35.4	6.8	27.7	4.9	0.8	NA	NA
PUE-005_T2	T2	39	4	24.6	1409	1758	40	0.801479	67.4	8	1.2	13.6	3.8	0.3	0.4	2.1	0.5	1.2	0.7	0.8	42.2	6.3	0.11	17.4	0.1	1.8	1.9	3.8	0.1	0.5	24.4	1.5	16.7	0.3	0.1	0.1	5	1.5	0.5	0.9	8.9	25.6	11.7	17.2	10.8	0.7	NA	NA
PUE-007_T2	T2	28	4	20.7	389	589	40	0.660441	40.4	12.9	3.2	17.5	4.8	7.6	1.4	1.9	1.1	3.5	4.4	1.1	23.2	3.5	0.037	37.3	0.5	3.5	7.2	12.1	0	1	9.9	1.8	19	1.7	0.2	0.5	6.4	2.5	0.7	2.2	6.6	17.6	4.3	31.7	4.3	2.5	NA	NA
PUE-008_T2	T2	32	2	23.5	778	1637	40	0.47526	53.9	6.3	1.1	26.5	4.7	1.1	0.1	0.3	2.3	2.3	0.2	1.3	30.3	20	0.1	25.9	0.3	6	3.7	9.6	0.1	1	2.3	0.7	33.6	3.7	0.2	0.4	8.6	1.9	0.8	7.1	3.9	9	4.7	12.3	6	7.6	NA	NA
PUE-009_T2	T2	34	4	28.1	305	556	40	0.548561	29	7.4	3.8	21.2	7.3	2.9	5.7	0.8	1.9	9.1	8.8	2	60.1	14.2	0.1	15.5	0.1	2.6	2.6	4.3	0	0.0056	0.4	0	50.4	3.7	0.1	0.1	9.7	2.9	0.2	0.2	3.3	7.8	7.7	10.4	2.9	0.5	NA	NA
PUE-010_T2	T2	32	4	24	741	1630	40	0.454601	33.7	11.8	1.7	38.2	3.3	0.6	0.2	0.2	0.5	3.4	5.3	1.2	46.3	12.6	0.1	29	0.2	3.1	3.1	4.8	0	0	0.8	0	31.6	2.6	0.1	0.1	12.7	5.4	0.2	0.7	7.9	18	6.6	9.3	3.6	1.2	NA	NA
PUE-011_T2	T2	23	4	26.6	1383	974	40	1.41992	74.6	6.9	1.6	11.5	1.4	1.1	0.3	0.1	0.2	2.1	0.4	0.1	65.7	10.3	0.087	15.4	0.2	3.5	1.1	2.9	0	0.012	0.7	0.1	85.9	2.8	0.3	0.1	3	0.7	0.1	0.1	1	0.6	1.6	1.9	1.5	0.3	NA	NA
